# Supplementary material
Source: ML conference proceedings conference paper supplement (https://proceedings.neurips.cc/paper_files/paper/2016/hash/2a79ea27c279e471f4d180b08d62b00a-Abstract.html)
Supplement: Supplementary file [file 2a79ea27c279e471f4d180b08d62b00a-Supplemental.zip]

---

# Supplementary Material: The Sound of APALM

## Clapping: Faster Nonsmooth Nonconvex Optimization with Stochastic Asynchronous PALM

---

**Damek Davis and Madeleine Udell**  
 Cornell University  
 {dsd95,mru8}@cornell.edu

**Brent Edmunds**  
 University of California, Los Angeles  
 brent.edmunds@math.ucla.edu

### Abstract

This document contains a few proofs, which were omitted from our NIPS submission.

## 1 Proof of Lemma 1

**Lemma 1** (Lyapunov Function Supermartingale Inequality). *For all  $k \in \mathbb{N}$ , let  $z^k = (x^k, \dots, x^{k-\tau}) \in \mathcal{H}^{1+\tau}$ . Then for all  $\epsilon \in \mathbb{R}_{++}$ , we have*

$$\begin{aligned} \mathbb{E}_k [\Phi(z^{k+1})] &\leq \Phi(z^k) - \frac{1}{2m} \sum_{j=1}^m \left( \frac{1}{\gamma_j^k} - (1 + \epsilon) \left( L_j + \frac{2L\tau}{m^{1/2}} \right) \right) \mathbb{E}_k [\|w_j^k - x_j^k + \gamma_j^k \nu_j^k\|^2] \\ &\quad + \sum_{j=1}^m \frac{\gamma_j^k (1 + \gamma_j^k (1 + \epsilon^{-1}) (L_j + 2L\tau m^{-1/2}))}{2m} \mathbb{E}_k [\|\nu_j^k\|^2] \end{aligned}$$

where for all  $j \in \{1, \dots, m\}$ , we have  $w_j^k \in \text{prox}_{\gamma_j^k r_j}(x_j^k - \gamma_j^k (\nabla_j f(x^{k-d_k}) + \nu_j^k))$ . In particular, for  $\sigma_k = 0$ , we can take  $\epsilon = 0$  and assume the last line is zero.

We first prove a descent property of the objective function—up to some residuals which are the result of asynchrony and noise:

**Lemma 2.** *For all  $k \in \mathbb{N}$ , we have*

$$\begin{aligned} \mathbb{E}_k [f(x^{k+1}) + r(x^{k+1})] &\leq f(x^k) + r(x^k) \\ &\quad - \frac{1}{2m} \sum_{j=1}^m \left( \frac{1}{\gamma_j^k} - (1 + \epsilon) L_j \right) \mathbb{E}_k [\|w_j^k - x_j^k + \nu_j^k \nu_j^k\|^2] \\ &\quad + \sum_{j=1}^m \frac{\gamma_j^k}{2m} (1 + (1 + \epsilon^{-1}) L_j \gamma_j^k) \mathbb{E}_k [\|\nu_j^k\|^2] \\ &\quad + \frac{1}{m} \mathbb{E}_k [\langle \nabla f(x^k) - \nabla f(x^{k-d_k}), w^k - x^k \rangle]. \end{aligned}$$

*Proof.* The standard upper bound [2, Lemma 1.2.3] for functions with Lipschitz continuous gradients implies that

$$\begin{aligned} f(x_1, \dots, w_j^k, \dots, x_m^k) &\leq f(x^k) + \langle w_j^k - x_j^k, \nabla f(x^k) \rangle + \frac{L_j}{2} \|w_j^k - x_j^k\|^2. \\ &\leq f(x^k) + \langle w_j^k - x_j^k, \nabla f(x^k) \rangle \\ &\quad + \frac{(1+\epsilon)L_j}{2} \|w_j^k - x_j^k + \gamma_j^k \nu_j^k\|^2 + \frac{(1+\epsilon^{-1})L_j}{2} \|\gamma_j^k \nu_j^k\|^2. \end{aligned}$$

And the definition of  $w_j^k$  as a proximal point implies that

$$r_j(w_j^k) \leq r(x_j^k) - \langle w_j^k - x_j^k + \gamma_j^k \nu_j^k, \nabla_j f(x^{k-d_k}) \rangle - \frac{1}{2\gamma_j^k} \|w_j^k - x_j^k + \gamma_j^k \nu_j^k\|^2 + \frac{1}{2\gamma_j^k} \|\gamma_j^k \nu_j^k\|^2.$$

Given these two inequalities and the identity  $\mathbb{E}_k[\nu^k] = 0$ , we have

$$\begin{aligned} \mathbb{E}_k[f(x^{k+1}) + r(x^{k+1})] &\leq \frac{1}{m} \sum_{j=1}^m f(x_1^k, \dots, w_j^k, \dots, x_m^k) + \sum_{j=1}^m \left( \frac{1}{m} r_j(w_j^k) + \left(1 - \frac{1}{m}\right) r_j(x_j^k) \right) \\ &\leq f(x^k) + r(x^k) - \frac{1}{2m} \sum_{j=1}^m \left( \frac{1}{\gamma_j^k} - (1+\epsilon)L_j \right) \mathbb{E}_k[\|w_j^k - x_j^k + \nu_j^k \nu_j^k\|^2] \\ &\quad + \sum_{j=1}^m \frac{\gamma_j^k}{2m} (1 + (1+\epsilon^{-1})L_j \gamma_j^k) \mathbb{E}_k[\|\nu_j^k\|^2] \\ &\quad + \frac{1}{m} \mathbb{E}_k[\langle \nabla f(x^k) - \nabla f(x^{k-d_k}), w^k - x^k \rangle]. \end{aligned}$$

□

The residual due to asynchrony can be conveniently placed inside a sum that alternates up to a small noise residual:

**Lemma 3.** *For all  $k \in \mathbb{N}$  and any  $\epsilon \in \mathbb{R}_+^m$ , we have*

$$\begin{aligned} &\frac{L}{2\sqrt{m}} \sum_{h=(k+1)-\tau+1}^{k+1} ((k+1) - h + 1) \mathbb{E}_k[\|x^h - x^{h-1}\|^2] \\ &\leq \frac{L}{2\sqrt{m}} \sum_{h=k-\tau+1}^k (k - h + 1) \|x^h - x^{h-1}\|^2 - \frac{1}{m} \mathbb{E}_k[\langle \nabla f(x^k) - \nabla f(x^{k-d_k}), w^k - x^k \rangle] \\ &\quad + \frac{(1+\epsilon)2L\tau}{2m^{3/2}} \mathbb{E}_k[\|w^k - x^k + \gamma_j^k \nu_j^k\|^2] + \sum_{j=1}^m \frac{(1+\epsilon^{-1})2L\tau \mathbb{E}_k[\|\gamma_j^k \nu_j^k\|^2]}{2m^{3/2}}. \end{aligned}$$

*Proof.* The asynchronous term splits into the sum of two alternating terms and a third easily handled term:<sup>1</sup> for all  $C > 0$ , we have

$$\begin{aligned}
& \frac{1}{m} \mathbb{E}_k [\langle \nabla f(x^k) - \nabla f(x^{k-d_k}), w^k - x^k \rangle] \\
& \leq \frac{1}{m} \mathbb{E}_k [L \|x^k - x^{k-d_k}\| \|w^k - x^k\|] \\
& \leq \mathbb{E}_k \left[ \frac{L}{2\sqrt{m}\tau} \|x^k - x^{k-d_k}\|^2 + \frac{L\tau}{2m^{3/2}} \|w^k - x^k\|^2 \right] \\
& \leq \mathbb{E}_k \left[ \frac{L}{2\tau\sqrt{m}} \sum_{j=1}^m d_{k,j} \sum_{h=k-d_{k,j}+1}^k \|x_j^h - x_j^{h-1}\|^2 + \frac{L\tau}{2m^{3/2}} \|w^k - x^k\|^2 \right] \quad (\text{by Jensen's inequality}) \\
& \leq \mathbb{E}_k \left[ \frac{L}{2\sqrt{m}} \sum_{j=1}^m \sum_{h=k-\tau+1}^k \|x_j^h - x_j^{h-1}\|^2 + \frac{L\tau}{2m^{3/2}} \|w^k - x^k\|^2 \right] \\
& = \mathbb{E}_k \left[ \left( \frac{L}{2\sqrt{m}} \sum_{h=k-\tau+1}^k (h-k+\tau) \|x^h - x^{h-1}\|^2 - \frac{L}{2\sqrt{m}} \sum_{h=k-\tau+2}^{k+1} (h-(k+1)+\tau) \|x^h - x^{h-1}\|^2 \right) \right. \\
& \quad \left. + \frac{L\tau}{2\sqrt{m}} \|x^{k+1} - x^k\|^2 + \frac{L\tau}{2m^{3/2}} \|w^k - x^k\|^2 \right].
\end{aligned}$$

The proof is completed by noticing that  $\mathbb{E}_k [\|x^{k+1} - x^k\|^2] = m^{-1} \mathbb{E}_k [\|w^k - x^k\|^2]$ , combining the two terms on the last line, and using the following inequality:

$$\|w^k - x^k\|^2 \leq \sum_{j=1}^m (1+\epsilon) \|w_j^k - x_k^k + \gamma_j^k \nu_j^k\|^2 + \sum_{j=1}^m (1+\epsilon^{-1}) \|\gamma_j^k \nu_j^k\|^2.$$

□

Summing up the bounds in the Lemmas, we obtain the claimed decrease in the Lyapunov function.

## 2 Relaxed Assumptions on the Variance When $r \equiv 0$

It's easy to modify the Lyapunov function in the case that  $r \equiv 0$  to the following form:

**Lemma 4** (Lyapunov Function Supermartingale Inequality). *For all  $k \in \mathbb{N}$ , let  $z^k = (x^k, \dots, x^{k-\tau}) \in \mathcal{H}^{1+\tau}$ . Then for all  $\epsilon \in \mathbb{R}_{++}$ , we have*

$$\begin{aligned}
\mathbb{E}_k [\Phi(z^{k+1})] & \leq \Phi(z^k) - \frac{1}{2m} \sum_{j=1}^m \gamma_j^k \left( 2 - (1+\epsilon) \left( L_j + \frac{2L\tau}{m^{1/2}} \right) \gamma_j^k \right) \|\nabla_j f(x^{k-d_k})\|^2 \\
& \quad + \sum_{j=1}^m \frac{(\gamma_j^k)^2 (1+\epsilon^{-1}) (L_j + 2L\tau m^{-1/2}) \mathbb{E}_k [\|\nu_j^k\|^2]}{2m}.
\end{aligned}$$

In particular, for  $\sigma_k = 0$ , we can take  $\epsilon = 0$  and assume the last line is zero.

Key to this inequality is that, at each iteration, the noise variance is multiplied by  $(\gamma_j^k)^2$ , rather than by  $\gamma_j^k$ . Following the proof of Theorem 1 yields the following theorem in the case that  $r \equiv 0$ :

**Theorem 1** (SAPALM Convergence Rates ( $r \equiv 0$ )). *Let  $\{x^k\}_{k \in \mathbb{N}} \subseteq \mathcal{H}$  be the SAPALM sequence created by Algorithm 1 in the case that  $r \equiv 0$ . If, for all  $k \in \mathbb{N}$ ,  $\{\mathbb{E}_k [\|\nu^k\|^2]\}_{k \in \mathbb{N}}$  is bounded (not necessarily diminishing), and*

$$(\exists a \in (1, \infty)), (\forall k \in \mathbb{N}), (\forall j \in \{1, \dots, m\}) \quad \gamma_j^k := \frac{1}{a\sqrt{k}(L_j + 2M\tau m^{-1/2})},$$

<sup>1</sup>we use the same bound presented in [1, Theorem 4.1], but we reproduce it for completeness.

then for all  $T \in \mathbb{N}$ , we have

$$\min_{k=0,\dots,T} S_k \leq \mathbb{E}_{k \sim P_T} [S_k] = O \left( \frac{m(\bar{L} + 2L\tau m^{-1/2}) + m \log(T+1)}{\sqrt{T+1}} \right),$$

where  $P_T$  is the distribution  $\{0, \dots, T\}$  such that  $P_T(X = k) \propto k^{-1/2}$ .

Now for the decrease of the Lyapunov function:

*Proof of Lemma 4.* The standard upper bound [2, Lemma 1.2.3] for functions with Lipschitz continuous gradients implies that

$$\begin{aligned} f(x_1, \dots, w_j^k, \dots, x_m^k) &= f(x^k) + \langle w_j^k - x_j^k, \nabla_j f(x^k) \rangle + \frac{L_j}{2} \|w_j^k - x_j^k\|^2 \\ &\leq f(x^k) + \langle w_j^k - x_j^k, \nabla_j f(x^k) \rangle \\ &\quad + \frac{(1+\epsilon)L_j}{2} \|w_j^k - x_j^k + \gamma_j^k \nu_j^k\|^2 + \frac{(1+\epsilon^{-1})L_j}{2} \|\gamma_j^k \nu_j^k\|^2. \end{aligned}$$

The inner product term can be split into two further pieces

$$\mathbb{E}_k [\langle w_j^k - x_j^k, \nabla_j f(x^k) \rangle] = \mathbb{E}_k [\langle w_j^k - x_j^k + \gamma_j^k \nu_j^k, \nabla_j f(x^{k-d_k}) \rangle] + \mathbb{E}_k [\langle w_j^k - x_j^k, \nabla_j f(x^k) - \nabla_j f(x^{k-d_k}) \rangle],$$

where we've use the equality  $\mathbb{E}_k [\nu_k] = 0$ . Thus, owing to the equality  $w_j^k - x_j^k + \gamma_j^k \nu_j^k = -\gamma_j^k \nabla_j f(x^{k-d_k})$ , we have

$$\begin{aligned} \mathbb{E}_k [f(x^{k+1})] &\leq \frac{1}{m} \sum_{j=1}^m f(x_1^k, \dots, w_j^k, \dots, x_m^k) \\ &\leq f(x^k) - \sum_{j=1}^m \frac{\gamma_j^k (2 - (1+\epsilon)L_j \gamma_j^k)}{2m} \|\nabla_j f(x^{k-d_k})\|^2 \\ &\quad + \sum_{j=1}^m \frac{(1+\epsilon^{-1})L_j}{2m} \|\gamma_j^k \nu_j^k\|^2 \\ &\quad + \frac{1}{m} \mathbb{E}_k [\langle \nabla f(x^k) - \nabla f(x^{k-d_k}), w^k - x^k \rangle]. \end{aligned}$$

The proof finished by combining this inequality with the inequality in Lemma 3.

□

## References

- [1] D. Davis. The Asynchronous PALM Algorithm for Nonsmooth Nonconvex Problems. *arXiv preprint arXiv:1604.00526*, 2016.
- [2] Y. Nesterov. *Introductory Lectures on Convex Optimization : A Basic Course*. Applied optimization. Kluwer Academic Publ., Boston, Dordrecht, London, 2004.
